# Supplementary material for: CCDC61/VFL3 Is a Paralog of SAS6 and Promotes Ciliary Functions
Source: PubMed Central journal article supplement (PMC7267773; doi:10.1016/j.str.2020.04.010), 2020-06-02

**Structure, Volume 28**

**Supplemental Information**

**CCDC61/VFL3 Is a Paralog of SAS6  
and Promotes Ciliary Functions**

**Takashi Ochi, Valentina Quarantotti, Huawen Lin, Jerome Jullien, Ivan Rosa e Silva, Francesco Boselli, Deepak D. Barnabas, Christopher M. Johnson, Stephen H. McLaughlin, Stefan M.V. Freund, Andrew N. Blackford, Yuu Kimata, Raymond E. Goldstein, Stephen P. Jackson, Tom L. Blundell, Susan K. Dutcher, Fanni Gergely, and Mark van Breugel**

1 **Supplementary tables**

2 **Table S1. Related to Figure 1.** Accession numbers of selected CCDC61 orthologs.

| Name of organism                            |                  | Accession number |
|---------------------------------------------|------------------|------------------|
| <i>Homo sapiens</i>                         | Human            | NP_001254652.1   |
| <i>Mus musculus</i>                         | Mouse            | NP_001028486.1   |
| <i>Gallus gallus</i>                        | Chicken          | NP_001006546.1   |
| <i>Xenopus laevis</i>                       | Frog             | XP_018084688.1   |
| <i>Danio rerio</i>                          | Zebrafish        | NP_001070634.1   |
| <i>Capitella teleta</i>                     | Worm             | ELU17212.1       |
| <i>Apis dorsata</i>                         | Bee              | XP_006623417.1   |
| <i>Pediculus humanus corporis</i>           | Body louse       | XP_002431146.1   |
| <i>Nicrophorus vespilloides</i>             | Beetle           | XP_017778830.1   |
| <i>Strongylocentrotus purpuratus</i>        | Sea urchin       | XP_011661626.1   |
| <i>Schmidtea mediterranea</i>               | Planaria         | SMU15034611      |
| <i>Amphimedon queenslandica</i>             | Sponge           | XP_019855245.1   |
| <i>Salpingoeca rosetta</i>                  | Choanoflagellate | XP_004997494.1   |
| <i>Batrachochytrium dendrobatidis JAM81</i> | Fungi            | XP_006681050.1   |
| <i>Paramecium tetraurelia strain d4-2</i>   | Ciliate          | XP_001428378.1   |
| <i>Tetrahymena thermophila SB210</i>        | Ciliate          | XP_001015880.1   |
| <i>Stylonychia lemnae</i>                   | Ciliate          | CDW82093.1       |
| <i>Thecamonas trahens ATCC 50062</i>        | Flagellate       | XP_013757734.1   |
| <i>Selaginella moellendorffii</i>           | Plant            | EFJ09694.1       |
| <i>Chlamydomonas reinhardtii</i>            | Green algae      | XP_001695308.1   |
| <i>Phytophthora parasitica P1569</i>        | Oomycete         | ETI35441.1       |
| <i>Trypanosoma cruzi strain CL Brener</i>   | Parasite         | XP_814690.1      |
| <i>Giardia lamblia P15</i>                  | Parasite         | EFO64425.1       |
| <i>Trichomonas vaginalis G3</i>             | Parasite         | XP_001298262.1   |

3

4

- 1 **Table S2. Related to Figure 2, 3 and 4.** Primers used for site-directed mutagenesis of human and  
 2 zebrafish CCDC61 plasmids and human genomic DNA PCR.

| Primers                           | Sequences                                                       |
|-----------------------------------|-----------------------------------------------------------------|
| hCCDC61 <sup>F128E/D129A</sup> _F | TACAGTGTGGAAGAAGCTCGCATTTCAT                                    |
| hCCDC61 <sup>F128E/D129A</sup> _R | ATGAATGCGAGCTTCTTCCACACTGTA                                     |
| hCCDC61 <sup>E5</sup> -F          | GAAGCGAGCGAAGAGAGCCTGGAAGCCGAGCTGGAAACCCTGACGAGCGAAC<br>TGGCA   |
| hCCDC61 <sup>E5</sup> -R          | TTCCAGCTCGGCTTCCAGGCTCTCTTCGCTCGCTTCCGCTTCTTCCAGTTCTTTA<br>GCCA |
| zCCDC61 <sup>F129E/D130A</sup> _F | CACGGTGGAGGAAGCTAGGATACATTA                                     |
| zCCDC61 <sup>F129E/D130A</sup> _R | TAATGTATCCTAGCTTCTCCACCGTG                                      |
| zCCDC61 <sup>E5</sup> -F          | GAAGCCTCCGAAGAGGCTCTTCAAATAGAGGTTGAAAGTCTGACCACTGAGTTG<br>GCC   |
| zCCDC61 <sup>E5</sup> -R          | TTCAACCTCTATTTCAAGAGCCTCTTCGGAGGCTTCAAGTTCTCTAACTGTTCC<br>ACCAG |
| Human genomic DNA<br>PCR forward  | TTCCAGGGTTCATGGGTCTAGGTTTCTCTCATCTCCTT                          |
| Human genomic DNA<br>PCR reverse  | CGAGGTCGACGAATTCGGCACACTCACAGCCAGCATCGAA                        |

3

4

1 **Table S3. Related to Figure 5.** Primers used to construct *Chlamydomonas* VFL3 plasmids.

| Primers         | Sequences                                         |
|-----------------|---------------------------------------------------|
| VFL3-1F         | GCTGTGCTGGCAGGCTGAAC                              |
| VFL3-7R         | TGCCCAAAGGCCCAAATGTC                              |
| VFL3-NotI-F     | CATGCTCGAGCGGCCGCTCGGTCCGATTGGTGCTATG             |
| VFL3-NdeI-R     | TCACAGTCTCGCATATGTCGCCCATTTCCCTTCACGC             |
| VFL3-13F-AflII  | TCAAGAAGTTCCCCGTGTTTCGTCA                         |
| VFL3-13R-HpaI   | CGACAACGGAGTTAACAGAGGCACGGGACGTCCCC               |
| VFL3-14F-HpaI   | CCGTGCCTCTGTAACTCCGTTGTTCGGTAAGCTTGTAGCC          |
| VFL3-14R-SalI   | CGCTCGCTGGCCGACTC                                 |
| exon7-HpaI-HA-F | TCCCGTGCCTCTGTTGGCCGCATCTTTTACCCATACG             |
| exon7-HpaI-HA-R | ACCGACAACGGAGTTGCACTGAGCAGCGTAATCTGG              |
| VFL3-7F         | TGCTCAGCCGGTTCCTCTTC                              |
| VFL3-15R-HpaI   | GCATGCATCAGTTAACCGCCTGTGTCTGTGCTGGTG              |
| VFL3-15F-HpaI   | GACACAGGCGGTTAACTGATGCATGCATGTAGCGGG              |
| VFL3-3R         | CACAGATGCACGGTGCCAGA                              |
| exon9-HpaI-HA-F | ACGACACAGGCGGTTGGCCGCATCTTTTACCCATACG             |
| exon9-HpaI-HA-R | ATGCATGCATCAGTTGCACTGAGCAGCGTAATCTGG              |
| VFL3-F126D127-F | CTGAGGAGGCCCGCGTGCCTACTACCCGCTA                   |
| VFL3-5R         | AGTCCTCCGTCAGCTGCCGT                              |
| VFL3-8F         | GTGGAGGTGGAGCAGAAGTC                              |
| VFL3-F126D127-R | CGCGGGCCTCCTCAGCGGCATAGGTCATAATGAGG               |
| VFL3-5E-F       | TCGAGGAGCTCGAGATGGAGATAGAGCAGCTGACGGAGGACTTAGAGGC |
| VFL3-6R         | CCACCACCCGGGAACCTTGA                              |
| VFL3-2F         | ACCCGCTACCGCTGCTGTTC                              |
| VFL3-5E-R       | TCTCGAGCTCCTCGATTTGCTCCTCGCAGCGACCCAGCTCGTCC      |

2

3

1 **Supplemental figure legends**

2

3 **Figure S1. Related to Figure 1.** Identification of CCDC61 as an XRCC4 superfamily member and  
4 sequence alignment of its orthologs. (A) A schematic flow chart of the computational approach  
5 used to identify CCDC61 as an XRCC4-superfamily member. (B) Sequence alignment of CCDC61  
6 orthologs from *Homo sapiens*, *Xenopus laevis*, *Danio rerio*, *Schmidtea mediterranea*,  
7 *Chlamydomonas reinhardtii* and *Paramecium tetraurelia*. The alignment was generated using the  
8 BOXSHADE server.  $\alpha$ -helices and  $\beta$ -strands observed in our crystal structures are highlighted with  
9 pink and green respectively, and are labelled on top of the alignment. Predicted helices are  
10 highlighted with blue boxes. Residue numbers are found next to the corresponding species names.  
11 Dark and light blue and red arrows point to residues in the head and coiled-coil domain,  
12 respectively, that were mutated in this study to address their functional role in CCDC61. The  
13 green arrow points to the position of the nonsense mutation K497X in the CCDC61 ortholog VFL3  
14 in *Chlamydomonas reinhardtii* strain *vfl3-1*.

15

16 **Figure S2. Related to Figure 2.** The N-terminal head domain of CCDC61 homodimerizes in  
17 solution. (A) The two head domain interactions of hCCDC61<sup>1-143</sup> observed in the asymmetric unit of  
18 the corresponding protein crystal. These two different packing interactions of hCCDC61<sup>1-143</sup> are  
19 shown in the rectangular boxes labelled D1 and D2. The protein chain common between D1 and  
20 D2 is represented using the Consurf (Glaser et al., 2003) conservation colour code as defined in  
21 the right bottom of the D1 box. (B) Detailed view of the  $\beta$ -zipper found in the head-to-head  
22 homodimer interface of hCCDC61<sup>1-143</sup> (dimer D1). The location of the  $\beta$ -zipper is indicated by a  
23 black square in the overview of the head-to-head homodimer shown on the left. Subunit colouring  
24 as in Figure 2A. Hydrogen bonds are represented by dotted lines. (C) AUC sedimentation velocity  
25 analysis of hCCDC61<sup>1-143</sup> and hCCDC61<sup>1-143; F128E/D129A</sup> in solution. Upper panels show Rayleigh  
26 interference profiles with best fits of a c(s) model (coloured lines) and their residuals to the fits  
27 underneath. The different colors represent scans at different times: blue is the earliest time points

1 where very little material has sedimented; through to red where all the material has sedimented  
2 and the signal is near baseline across the radius. For clarity, only every 3<sup>rd</sup> scan and 7<sup>th</sup> data point  
3 is displayed. The lower panels show the  $c(s)$  distribution of species. The wild-type protein had two  
4 main sedimenting species: the species at 1.27 S ( $S_{w,20} = 2.02$  S) had a calculated mass of approx.  
5 17.5 kDa with frictional ratio ( $f/f_0$ ) = 1.20, close to that expected for a monomer (16.5 kDa); and a  
6 species at 1.70 S ( $S_{w,20} = 2.71$  S) with a calculated mass of 27.3 kDa close to the mass expected  
7 for a dimer (33 kDa). hCCDC61<sup>1-143; F128E/D129A</sup> had only one main sedimenting species at 1.15 S  
8 ( $S_{w,20} = 1.83$  S) with a corresponding mass of approx. 16 kDa with  $f/f_0 = 1.245$ . This is close to the  
9 mass expected for a monomer (16.4 kDa). (D) Analysis of an AUC equilibrium sedimentation  
10 experiment with wild-type protein in three different concentrations (1.3, 4 and 12 mg/ml) at 11,600  
11 (dark blue), 19,700 (light blue) and 34,000 rpm (maroon). For clarity only every 6<sup>th</sup> data point is  
12 displayed. The data revealed average molecular masses from 22-33 kDa consistent with a  
13 monomer-dimer equilibrium. Fitting such a model to the data gave a global value for the  
14 dimerisation dissociation constant  $K_d = 170 \pm 18 \mu\text{M}$ . (E) 2D <sup>1</sup>H,<sup>15</sup>N BEST-Trosy spectra of <sup>15</sup>N-  
15 labelled human SAS6<sup>1-143</sup> alone (black) or mixed with unlabelled hCCDC61<sup>1-143</sup> (red). No  
16 significant chemical shift perturbation of <sup>15</sup>N-labelled human SAS6<sup>1-143</sup> was observed in the  
17 presence of unlabelled hCCDC61<sup>1-143</sup>, arguing against an interaction between these two proteins.

18  
19 **Figure S3. Related to Figure 2.** Comparison of XRCC4 superfamily proteins. (A) Structural  
20 comparison of zCCDC61 (pink; Figure 2C), *L. major* SAS6 (cyan); PDB code: 4CKP (van Breugel  
21 et al., 2014)), *C. elegans* SAS6 (sky blue; PDB code: 3PYI (Hilbert et al., 2013)) and *H. sapiens*  
22 XRCC4/XLF (yellow and grey respectively; PDB code: 3W03 (Wu et al., 2011));. (B) Superposition  
23 of the head domains of zCCDC61 (pink), *L. major* SAS6 structures (cyan), *C. elegans* SAS6 (sky  
24 blue) and *H. sapiens* XRCC4/XLF (yellow and grey respectively). Both the relative head-to-head  
25 dimer orientations and the head-domain – coiled-coil domain orientation differ between these  
26 structures, explaining the different oligomeric assemblies formed by them. The relative orientations

1 of the head-to-head dimers were measured using C $\alpha$  atoms of a conserved hydrophobic residue  
2 indicated by the red arrowhead in Figure S7A.

3

4 **Figure S4. Related to Figure 3.** CCDC61 binds microtubules. (A) Transiently over-expressed  
5 hCCDC61 colocalizes with microtubules in cells. Immunofluorescent images of RPE-1 cells  
6 expressing the indicated GFP-hCCDC61 constructs and stained against GFP and  $\alpha$ -tubulin. Scale  
7 bars are 10  $\mu$ m. (B) Microtubule-stabilizing and -destabilizing agents do not affect the proportion of  
8 cells containing CCDC61 filaments. Immunofluorescent images of RPE-1 cells expressing GFP-  
9 hCCDC61 that were treated with DMSO (control), 5  $\mu$ M taxol (Taxol) or 5  $\mu$ g/ml nocodazole  
10 (Noco.) for 3 hours. The regions indicated by white rectangles (1: CCDC61 containing, 2: largely  
11 devoid of CCDC61) are shown magnified in the second and third columns.  $\alpha$ -tubulin staining of the  
12 regions devoid of CCDC61 indicated that in these regions taxol-treated cells tend to have thicker  
13 microtubule bundles whereas nocodazole-treated cells have a more dispersed  $\alpha$ -tubulin staining  
14 there. Scale bars, 20  $\mu$ m. Bar graphs show the ratios of cluster-only versus filament-containing  
15 RPE-1 cells expressing GFP-hCCDC61 observed under the experimental conditions (DMSO  
16 ( $n=169$ ), taxol ( $n=240$ ), nocodazole ( $n=253$ )). Error bars are standard deviations calculated from  
17 three biological replicates. (C) CCDC61 filaments are retained in the presence of nocodazole. Live  
18 cell imaging of a control RPE-1 cell after addition of 0.1%(v/v) DMSO and three RPE-1 cells (cell 1:  
19 upper panel, cell 2: lower panel with white arrowheads and cell 3: lower panel with white arrows)  
20 containing GFP-hCCDC61 filaments after addition of 5  $\mu$ g/ml nocodazole. Scale bar, 10  $\mu$ m. (D)  
21 Conserved positively charged residues in  $\alpha$ 7 are essential for microtubule binding by hCCDC61.  
22 Coomassie stained SDS-PAGE gel showing a co-pelleting assay with taxol-stabilized microtubules  
23 and the 5E mutant of the coiled-coil domain of hCCDC61. S, supernatant, P, pellet. (E) Western  
24 blot showing the results of a GFP-pulldown from tissue culture cell extracts of HEK293T cells  
25 transiently overexpressing GFP- or 3xHA-tagged hCCDC61 mutants. Shown is the ponceau  
26 stained blot (top) as well as the blot staining with an anti-HA antibody (bottom). (F) Circular  
27 dichroism (CD) spectra of zCCDC61<sup>146-280</sup> (black) and its 5E mutant (red). The figure shows CD

1 spectra at 5 °C (left) and melting curves of these constructs as observed at 222 nm at increasing  
2 temperatures (right). (G) Removal of the C termini of tubulins in microtubules by subtilisin. 2 mg/ml  
3 taxol-stabilised microtubules “C” were incubated with a four-fold dilution series of subtilisin. The  
4 highest used concentration of subtilisin was 2 mg/ml. Reactions were stopped by PMSF addition  
5 and parts of these reactions were separated by SDS-PAGE followed by Coomassie Blue staining.  
6 The corresponding gel is shown here. The remainder of the reaction marked by a black arrow was  
7 subsequently used for the co-pelleting assay shown in (H), in the panel beneath. (H) The C-  
8 terminal tails of tubulins are required for CCDC61 binding to microtubules. Coomassie stained  
9 SDS-PAGE gel showing a co-pelleting assay of the coiled-coil domain of hCCDC61 with either  
10 untreated taxol-stabilized microtubules (MT) or subtilisin-treated taxol-stabilized microtubules that  
11 lack the C-terminal tails of tubulin (MT<sup>ΔC</sup>, see (G)). S, supernatant, P, pellet. (I) Immunofluorescent  
12 images of RPE-1 cells overexpressing GFP-hCCDC61<sup>5E</sup> and stained against GFP and  $\alpha$ -tubulin.  
13 We examined a total of 101 cells from three biological replicates but did not observe any filament  
14 formation by GFP-hCCDC61<sup>5E</sup>. Scale bar is 20  $\mu$ m.

15  
16 **Figure S5. Related to Figure 4.** CCDC61 does not play a major role in cell division but has a  
17 function in ciliogenesis. (A) CRISPR/Cas9 knockout strategy and results of *CCDC61* knock-out in  
18 RPE-1 cells. Inserts (pink) and premature-stop codon positions (pink arrows) are indicated in a  
19 schematic diagram of the genomic locus of *CCDC61*. An agarose gel image shows genomic PCR  
20 results of two-independent *CCDC61* knockout RPE-1 cells. (B) FACS profiles of control and two  
21 *CCDC61*-knockout RPE-1 cells. The colour scheme of the FACS profile of each cell is as follows:  
22 experimental data, which are cell count x Hoechst-area, (black), diploid in G0/G1 (red “\”), diploid in  
23 S (red “|”), diploid in G2/M (red “/”) and fitted curve (green). Bar graphs show quantification of the  
24 numbers of cells in G1, S and G2/M cells from three biological replicates. Error bars are standard  
25 deviations. (C) Centrosome numbers of control and *CCDC61* knockout RPE-1 cells. The numbers  
26 of centrioles of monastrol treated RPE-1 cells were counted by immunostaining with Centrin-3. 30  
27 mitotic cells were counted per cell line from one sample per cell type. (D) Proliferation profiles of



1 control and the *CCDC61*-knockout RPE-1 cells. Data correspond to three biological replicates.  
2 Error bars are standard deviations. (E) Reduction of ciliated cells upon knockdown of *CCDC61* in  
3 RPE-1 cells. The top bar graphs show knockdown efficiencies of cell only (Cells), transfection-  
4 reagent only (RNAiMAX), control siRNA (CT siRNA) and three different siRNAs against *CCDC61*  
5 (siRNA 1,2 and 3), assessed by RT-PCR and calculated from three biological replicates. The  
6 bottom bar graphs show ciliogenesis efficiencies of these control and *CCDC61* knockdown RPE-1  
7 cells. Data correspond to three biological replicates (total cell counts  $n=1130, 1157, 717, 738, 715$   
8 and 565 for Cells, RNAiMAX, CT siRNA, siRNA 1, siRNA 2 and siRNA 3 respectively).  
9 Percentages are relative to CT siRNA-treated cells. Bar graphs show mean  $\pm$  standard deviation.  
10 Representative immunofluorescent images used for the quantification of the ciliogenesis  
11 efficiencies are shown on the right. Scale bar is 10  $\mu\text{m}$ .

12  
13 **Figure S6. Related to Figure 5.** Rescue of *Chlamydomonas vfl3* strains. (A) Abnormal striated  
14 fibers in *vfl3* strains. Staining of striated fibers in the wild-type, *vfl3-1* and *vfl3-2* mutants, and the  
15 rescued *vfl3-2* strains. Striated fibers are indicated by staining of centrin (green) and cilia are  
16 indicated by staining of acetylated  $\alpha$ -tubulin (red). Scale bar is 4  $\mu\text{m}$ . (B) Expression of mRNA of  
17 *VFL3* in the wild-type strain, *vfl3* strains and the strains expressing *VFL3* constructs. *CNK10* was  
18 used for control. (C) Five independent transformants carrying the 3x HA tag in exon 7 of *VFL3*.  
19 Molecular weights are indicated on the right. (D) Transformants carrying wild-type, 5E-, and FD-  
20 *VFL3* all express the *VFL3* protein. Molecular weights are indicated on the right.

21  
22 **Figure S7. Related to Figure 1** Comparison of the XRCC4 superfamily members. (A) Structure-  
23 guided sequence alignment of the XRCC4 superfamily members. A conserved motif is indicated by  
24 a red-dotted rectangle. The red arrowhead indicates the conserved hydrophobic residue whose  $C\alpha$   
25 atoms were used to measure the relative orientations of the head-to-head dimers in Figure S3B.  
26 (B) Amino-acid sequence identities between the XRCC4 superfamily members as observed in their  
27 N-terminal head domains. The alignment shown in (A) was used to calculate sequence identities

1 using the SIAS server (<http://imed.med.ucm.es/Tools/sias.html>). Shown below these values are the  
2 R.M.S.D. values of superpositions of the corresponding N-terminal head domain structures. (C) A  
3 hypothetical CCDC61 filament bundle. Two linear zCCDC61 filaments (surface representation in  
4 cyan and pink) were superimposed onto the CCDC61 D2 dimer (Figure S2A) found in the  
5 asymmetric unit of the hCCDC61<sup>1-143</sup> crystal (cartoon representation). The two dimers D1 (red and  
6 blue) and D2 (red and green) are indicated by black arrows. (D) Coomassie stained SDS-PAGE  
7 gels showing the purified hCCDC61<sup>1-143</sup>, hCCDC61<sup>1-143; F128E/D129A</sup>, zCCDC61<sup>1-168; F129E/D130A</sup>, His<sub>6</sub>-  
8 lypoyl-zCCDC61<sup>1-170</sup>, His<sub>6</sub>-lypoyl-zCCDC61<sup>1-170; F129E/D130A</sup>, zCCDC61<sup>1-170</sup>, zCCDC61<sup>146-280</sup>,  
9 zCCDC61<sup>146-280; 5E</sup> and hSAS6<sup>1-143</sup> used for AUC, CD, crystallography, NMR and SEC-MALS  
10 experiments.



Figure S2

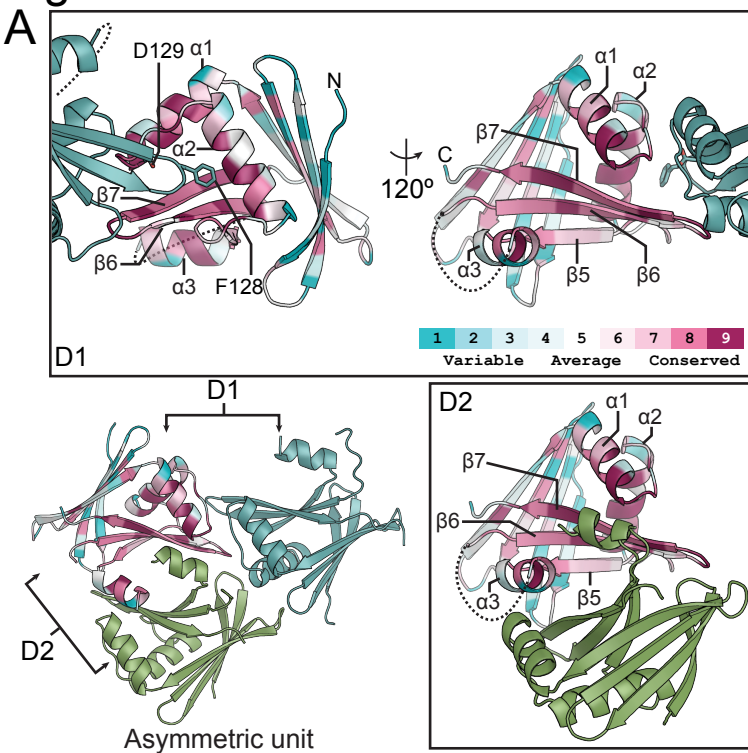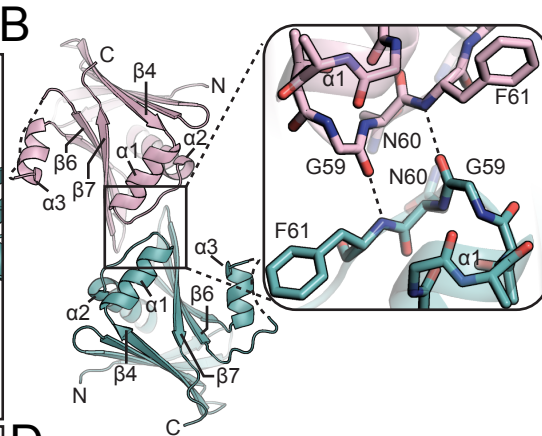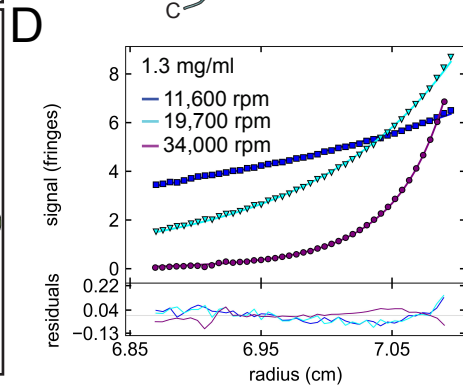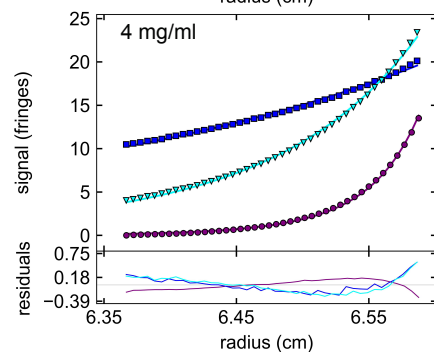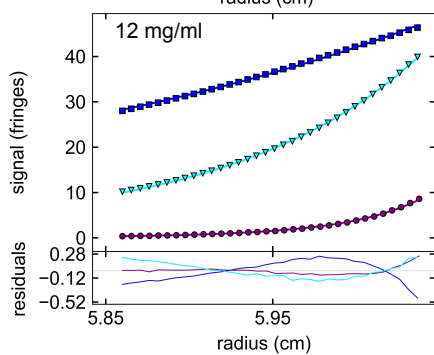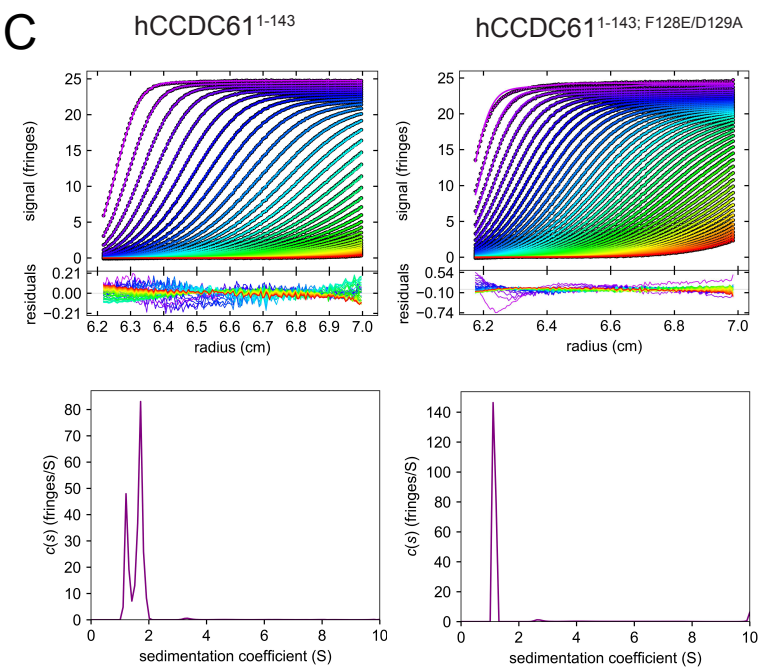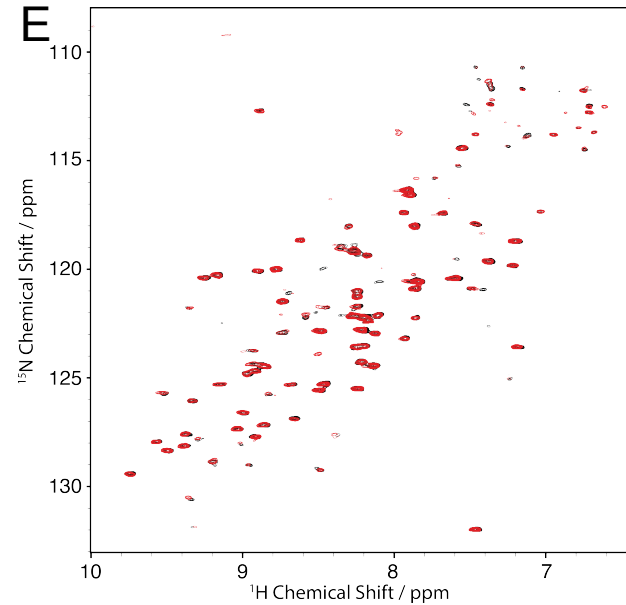

Figure S3

A

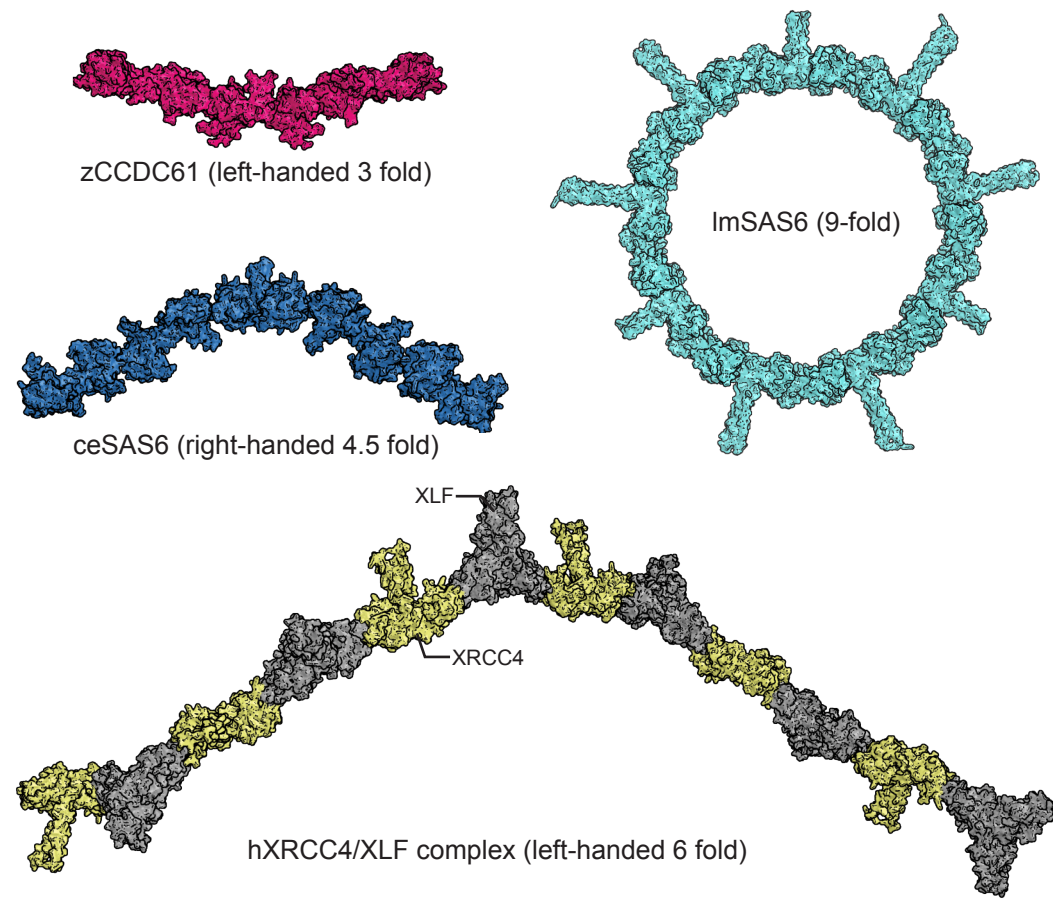

B

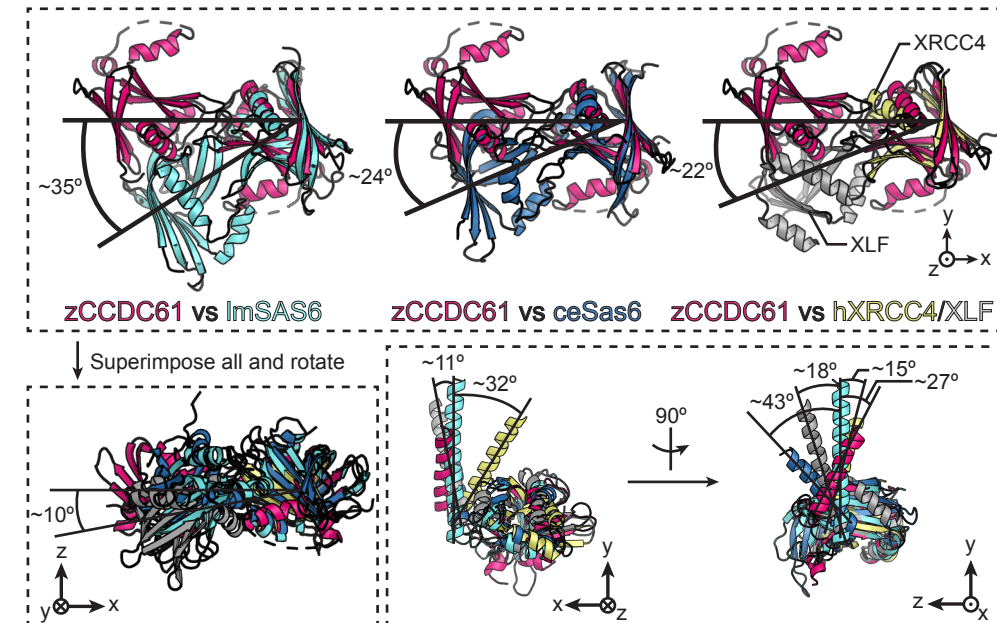

# Figure S4

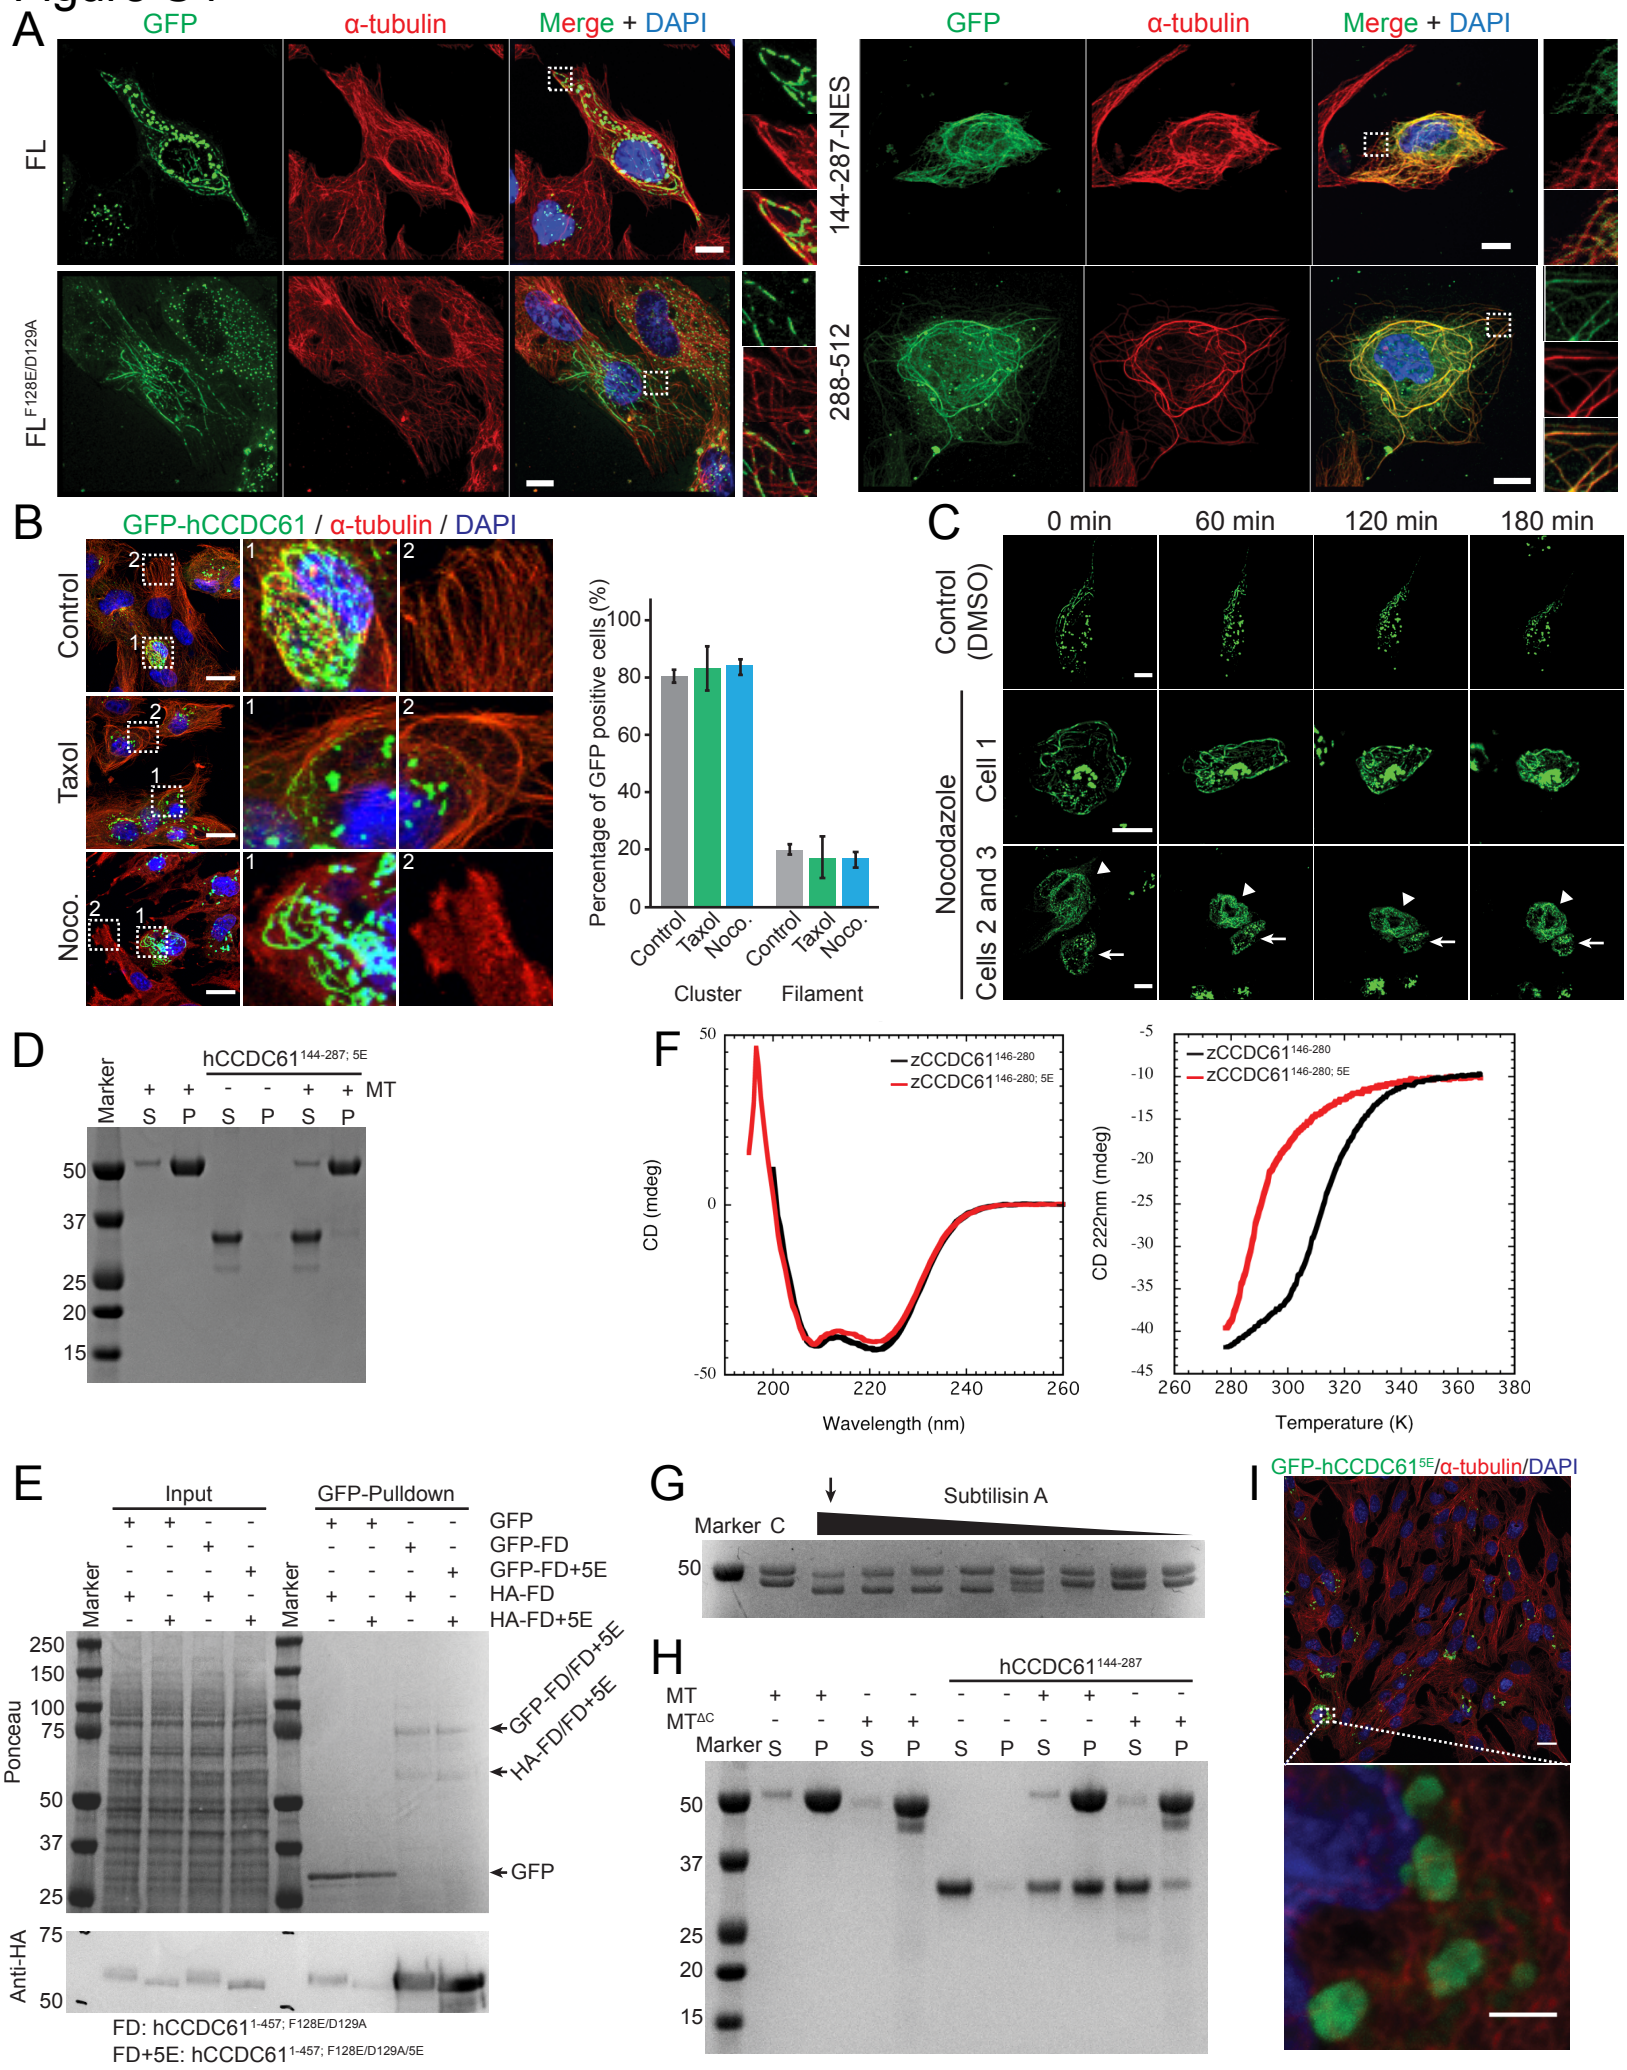

# Figure S5

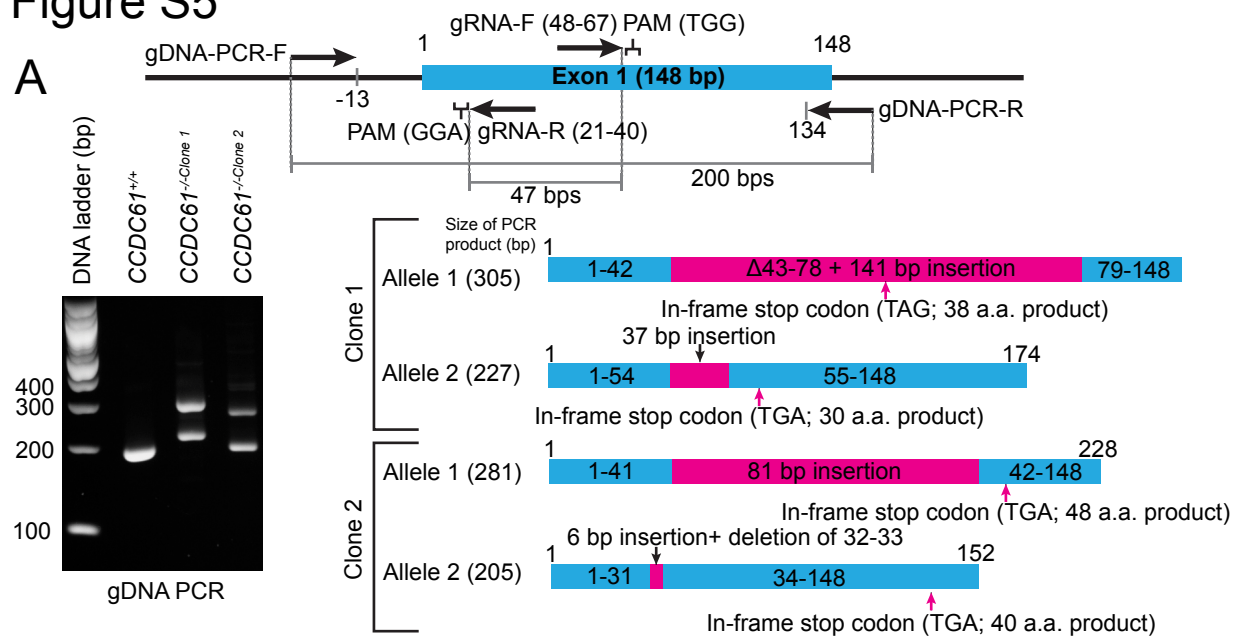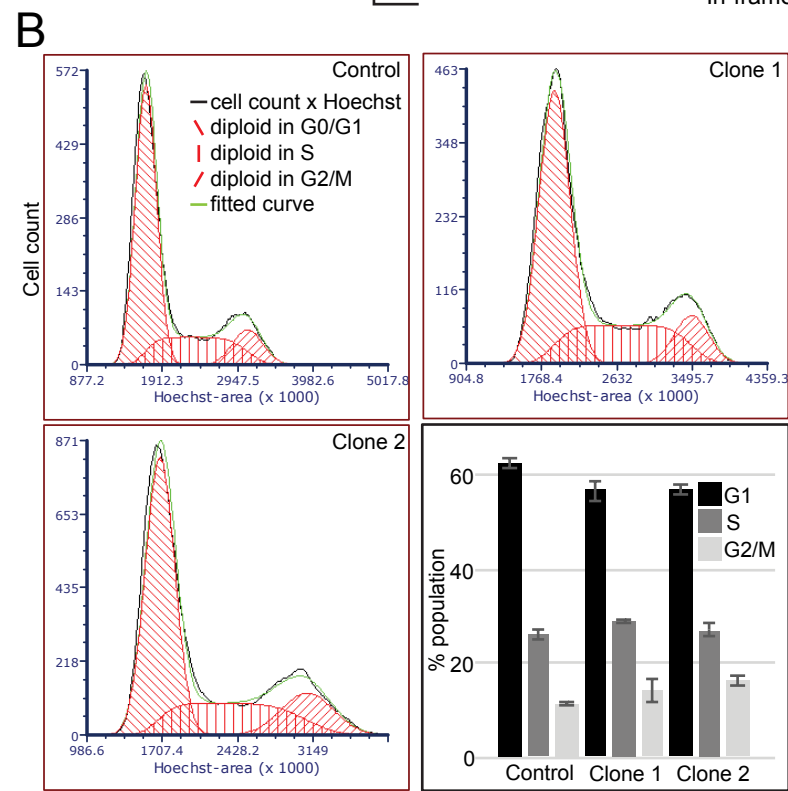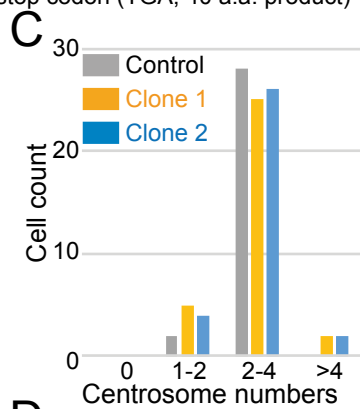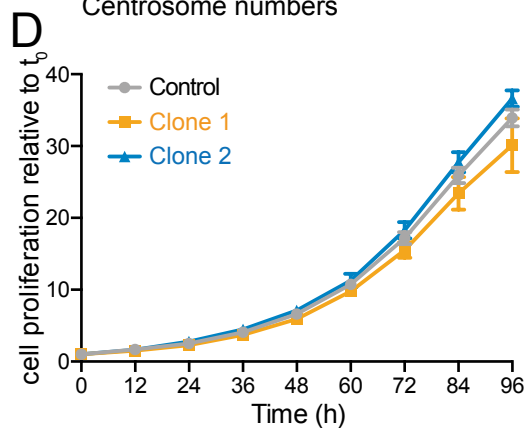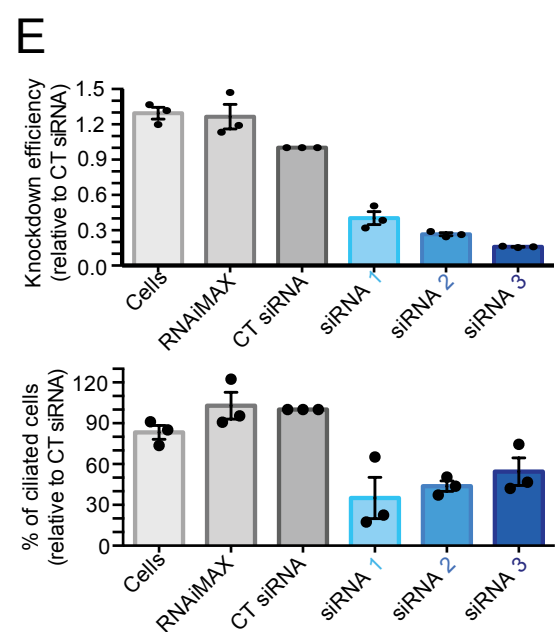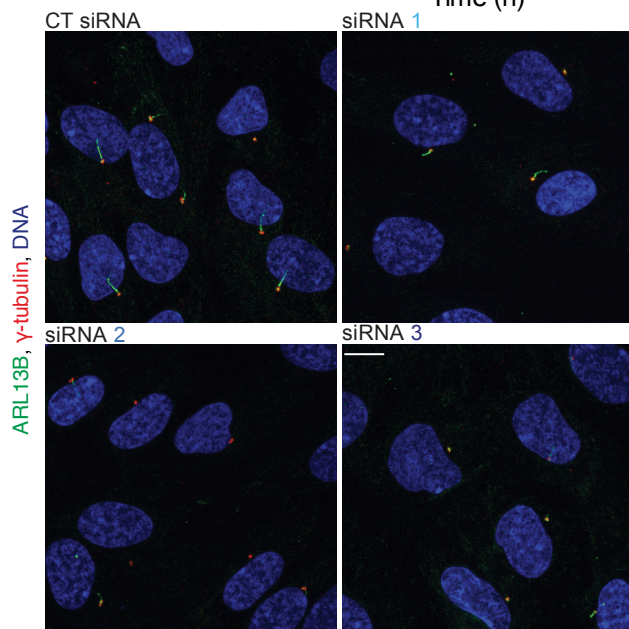

Figure S6

A

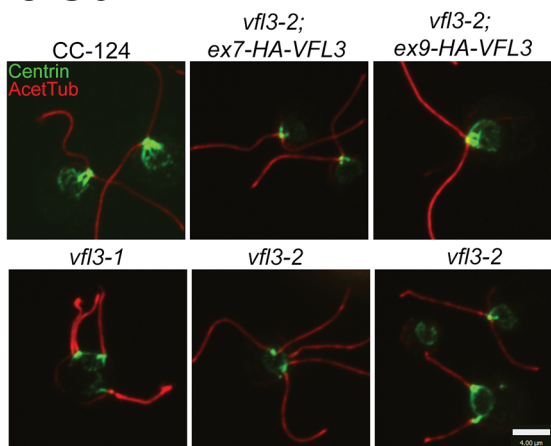

C

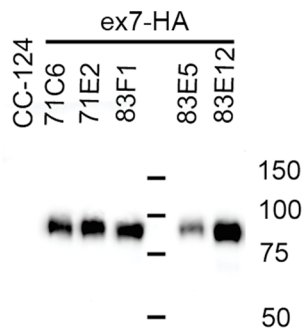

B

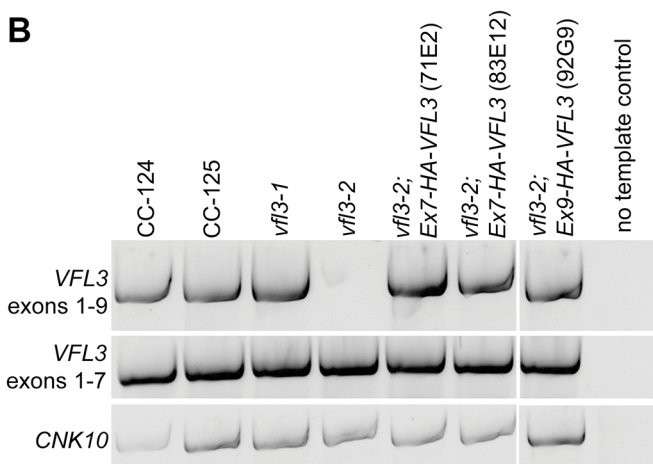

D

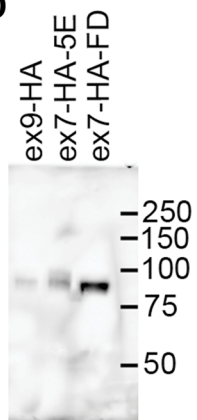



# Figure S7

## A

```

hCCDC61 1 -----MDQPAGLQVDYVFR-----GVEHAVRVMVSG-----QVLEFEVEDRMT-ADQWRGFEFDAGFIEDLTHKTGN--FKQFNI
hSAS6 1 -----MSQVLFHQLVPIQVKCKDCEERRVSIKMSIELQSVSNPVHRKDLVIRLTDDDPFFLYNLVISEEDFQSLKFQQGL--LVDFLA
hXRCC4 1 -----MERKISRIRHV-----SEPSITHFLOVSWEK-----TLESGFVITLTDG---HSAWTGTVSESEISQEADDMAM----EKGK
hXLF 1 MEELEQGLLMOPAWLQ-----AENSLLAKVFITK-----QGYALLVSDL---QQVWHEQVDTSVVSORAKELNKRLTAPPAA
hPAXX 1 -----MDPLSPPLCTLP-----GPEPPRFVCYCEGEE-SGEGRGCFNLVTDA---AELWSTCFTPDSLAALKARFGL----SAED

```

Conserved motif

```

hCCDC61 67 FCHMLESALTOSS-----ESVFLDLLTYTDLESLRNRKMGRPGSLAPRSAQLNSKRYILIYSVEFD-RIHY-PLPLPYQ
hSAS6 83 FPQKFIDLLQCTQEHAKEIPRFLLQVSPAA-----ILDNSPAFINVVETNPFKHLTHI-SLKLLPG
hXRCC4 66 YVGELRKALLSGAG---PADVYTFNFS-----KESCYFFFEKNLK-DVSFRLGSFNLEKV
hXLF 72 FLCHLDNLLRPLLKDAAH-PSEATFSCDC-----VADALIRVRSELS-GLPFYW-NFHCMLA
hPAXX 72 ITPRFRACEQ-----QAVALTLQ-----EDRASLTLS-GGP---SALA-AFDLSKV

```

## B

|        |              |              |              |             |            |
|--------|--------------|--------------|--------------|-------------|------------|
| CCDC61 | 100 / 0.00   |              |              |             |            |
| SAS6   | 12.85 / 4.56 | 100 / 0.00   |              |             |            |
| XRCC4  | 11.20 / 3.06 | 11.20 / 4.38 | 100 / 0.00   |             |            |
| XLF    | 9.52 / 3.37  | 7.93 / 5.34  | 15.51 / 4.26 | 100 / 0.00  |            |
| PAXX   | 13.39 / 4.00 | 16.96 / 5.93 | 11.60 / 4.24 | 8.03 / 3.92 | 100 / 0.00 |
| CCDC61 | SAS6         | XRCC4        | XLF          | PAXX        |            |

Sequence identities (%) / R.M.S.D (Å)

## C

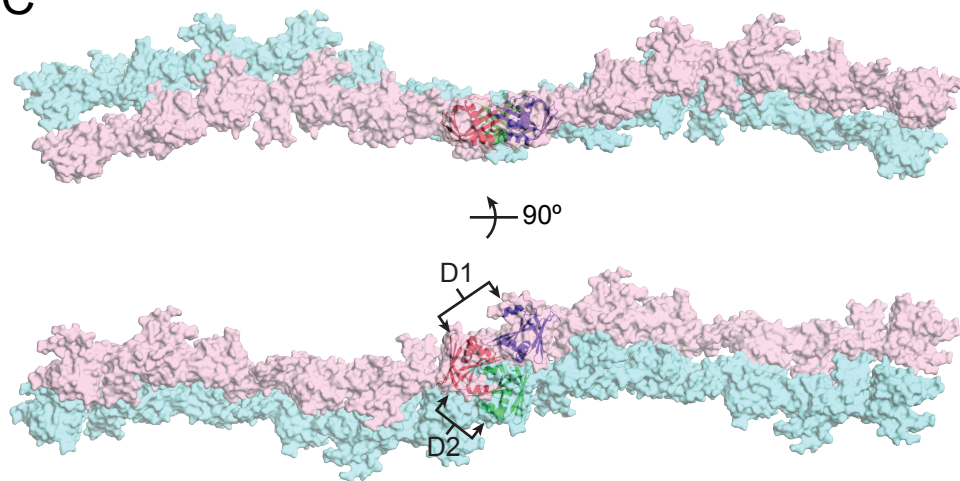

## D

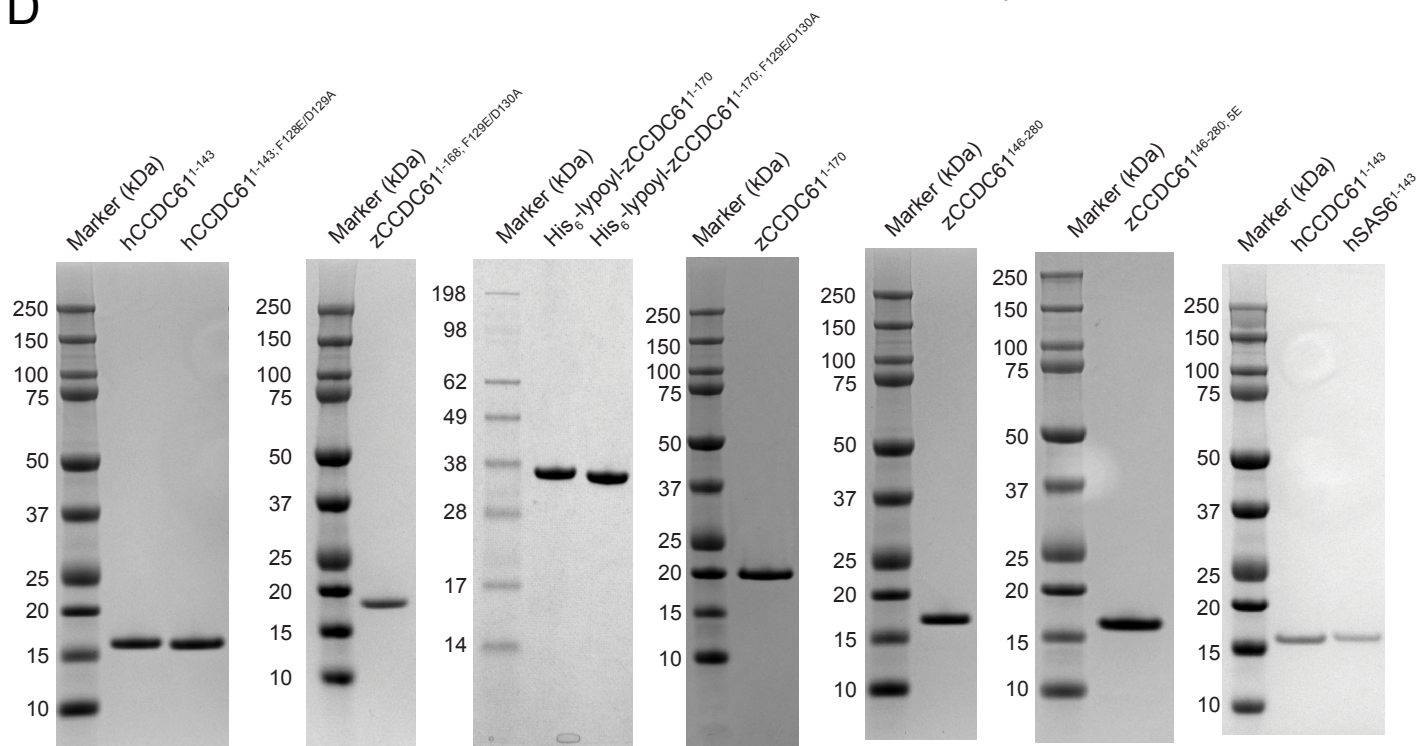

Supplement: mmc1.pdf [file mmc1.pdf]
